# Supplementary material for: Degradation of leachate from a semi-anaerobic aged refuse biofilter by the ZVI/H2O2 process coupled with microwave irradiation: optimization, organics transformation, and reaction mechanisms
Source: Royal Society of Chemistry journal article supplement (doi:10.1039/c8ew00469b), 2018-01-01
Supplement: c8ew00469b1.pdf [file c8ew00469b1.pdf]

## Supplementary data for

# Degradation of leachate from semi-anaerobic aged refuse biofilter by the ZVI/H<sub>2</sub>O<sub>2</sub> process coupled with microwave irradiation: Optimization, organics transformation, and reaction mechanisms

Aiping Zhang<sup>1\*</sup>, Zhepei Gu<sup>1</sup>, Weiming Chen<sup>2</sup>, Qibin Li<sup>2</sup>

<sup>1</sup>Key Laboratory of Treatment for Special Wastewater of Sichuan Province Higher Education System, College of Chemistry and Materials Science, Sichuan Normal University, Chengdu 610066, China.

<sup>2</sup>Faculty of Geosciences and Environmental Engineering, Southwest Jiaotong University, Chengdu 611756, China. Corresponding author Tel: +86 13488951126

E-mail address: [apzhang@sicnu.edu.cn](mailto:apzhang@sicnu.edu.cn) (A.P. Zhang)

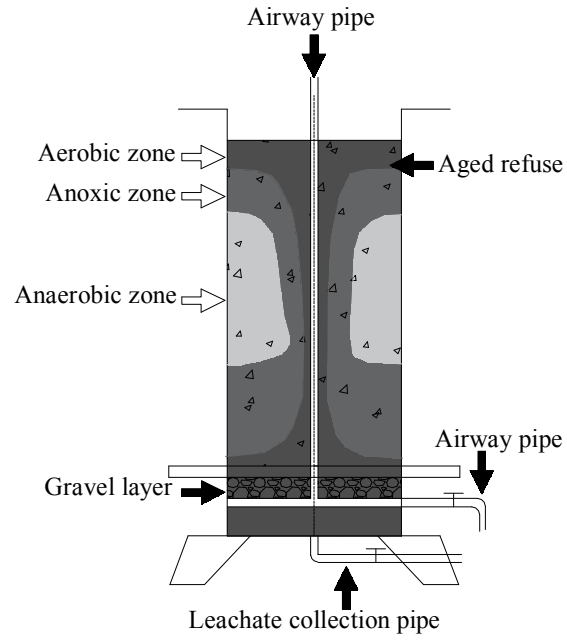

**Fig. S1.** The schematic of the semi-aerobic aged refuse biofilter.

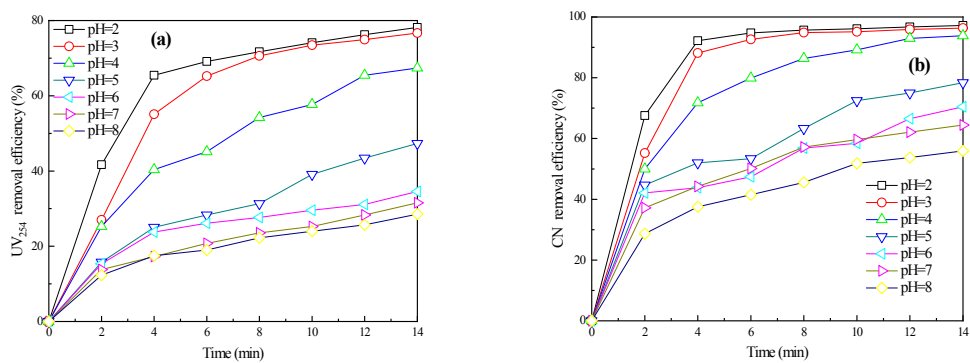

**Fig. S2.** Effects of initial pH on organics pollutants removal in the MW-ZVI/H<sub>2</sub>O<sub>2</sub> process, (a) as indicated by changes in UV<sub>254</sub> and (b) as indicated by changes in color number (CN). Operating conditions were: [H<sub>2</sub>O<sub>2</sub>]<sub>0</sub> = 15 mL/L, [ZVI]<sub>0</sub> = 0.5 g/L and MW power = 450 W.

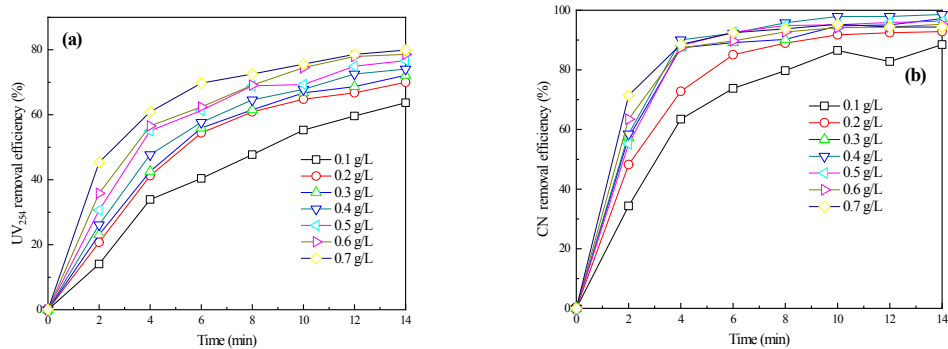

**Fig. S3.** Effects of zero valent iron (ZVI) dosage on organic pollutants removal in the MW-ZVI/H<sub>2</sub>O<sub>2</sub> process (a) as indicated by changes in UV<sub>254</sub> and (b) as indicated by changes in color number (CN). Operating conditions were: initial pH = 3.0,  $[H_2O_2]_0 = 15$  mL/L and MW power = 450 W.

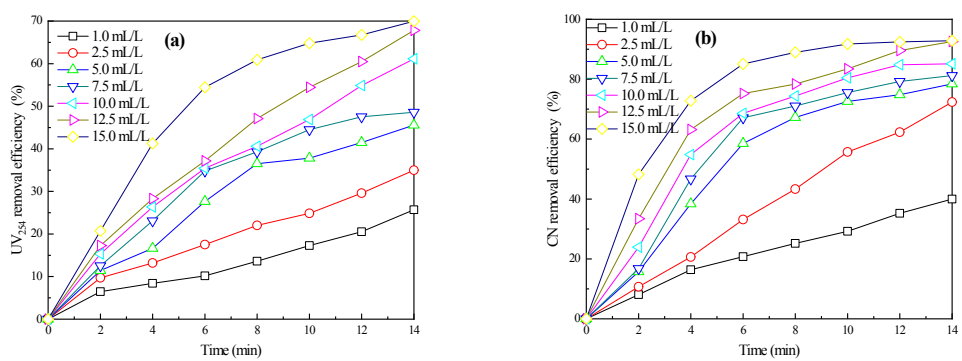

**Fig. S4.** Effects of hydrogen peroxide (H<sub>2</sub>O<sub>2</sub>) dosage on organic pollutants removal in the MW-ZVI/H<sub>2</sub>O<sub>2</sub> process (a) as indicated by changes in UV<sub>254</sub> and (b) as indicated by changes in color number (CN). Operating conditions were: initial pH = 3.0, [ZVI]<sub>0</sub> = 0.5 g/L and MW power = 450 W.

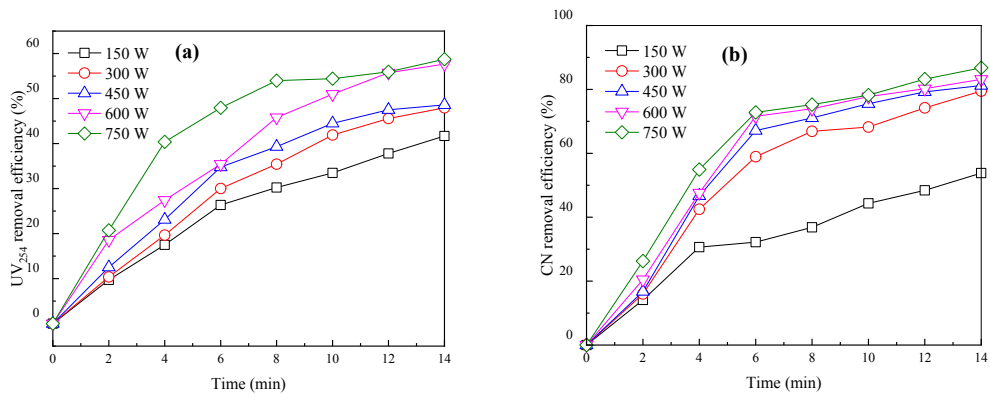

**Fig. S5.** Effects of microwave irradiation power on organic pollutants removal in the MW-ZVI/H<sub>2</sub>O<sub>2</sub> process (a) as indicated by changes in UV<sub>254</sub> and (b) as indicated by changes in color number (CN). Operating conditions were: initial pH = 3.0, [ZVI]<sub>0</sub> = 0.5 g/L and [H<sub>2</sub>O<sub>2</sub>]<sub>0</sub> = 15 mL/L.
